# Supplementary material for: Oocyte Scoring Enhances Embryo-Scoring in Predicting Pregnancy Chances with IVF Where It Counts Most
Source: PLoS One. 2015 Dec 2;10(12):e0143632. doi: 10.1371/journal.pone.0143632 (PMC4668065; doi:10.1371/journal.pone.0143632)
Supplement: S1 Table — (XLSX) [file pone.0143632.s001.xlsx]

## Sheet: Table S1
Classification of oocyte quality by multiple parameters in IVF cycle, CHR-NY
No.	Donor_Age	Oocyte Quality and Classification															Embryo Development					ET	HCG	# sacs
		Oocyte Maturity				MII Eggs	Seri.No.	Morph.	Size	Cyt	PVS	Zona	Pb	Total Oocyte Score (TOS)	Egg	Grade	Day 1	Day 2	Day 3	Day 4	Grade				#FHB
		AT	MII	Immature	Total			-1/0/1	-1/0/1	-1/0/1	-1/0/1	-1/0/1	-1/0/1				PN	2-cell	4-8 cell	>8 cell
1		0	5	0	0	5	1	-1	0	-1	0	0	-1	-3	1	B	PN		8		5	T	NEG
1							2	-1	0	-1	0	0	-1	-3	1	B	PN		8		5	T
1							3	-1	0	-1	0	0	-1	-3	1	B	PN		8		5	T
1							4	-1	0	-1	0	0	-1	-3	1	B	PN		3		4	T
1							5	-1	0	-1	0	0	-1	-3	1	B	0		0		0	D
2		0	3	0	3	3	1	-1	-1	-1	0	0	0	-3	1	B	PN		8		4	T	NEG
2							2	-1	-1	-1	0	0	0	-3	1	B	PN		6		4	T
2							3	-1	-1	-1	0	0	0	-3	1	B	PN		8		3	T
3		0	23	1	24	23	1	1	1	0	1	1	0	4	1	G	PN		8		5	T	POS	2	2
3							2	1	1	0	1	1	0	4	1	G	PN		8		5	T
3							3	1	1	0	1	1	0	4	1	G	PN		8		5	F
3							4	1	1	0	1	1	0	4	1	G	PN		8		5	F
3							5	1	1	0	1	1	0	4	1	G	PN		8		5	F
3							6	1	1	0	1	1	0	4	1	G	PN		8		5	F
3							7	1	1	0	1	1	0	4	1	G	PN		8		5	F
3							8	1	1	0	1	1	0	4	1	G	PN		8		5	F
3							9	1	1	0	1	1	0	4	1	G	PN		8		5	F
3							10	1	1	0	1	1	0	4	1	G	PN		8		4	F
3							11	1	1	0	1	1	0	4	1	G	PN		8		4	F
3							12	1	1	0	1	1	0	4	1	G	PN		8		4	F
3							13	1	1	0	1	1	0	4	1	G	PN		8		4	F
3							14	1	1	0	1	1	0	4	1	G	PN		8		4	F
3							15	1	1	0	1	1	0	4	1	G	PN		8		4	F
3							16	1	1	0	1	1	0	4	1	G	PN		8		4	F
3							17	1	1	0	1	1	0	4	1	G	PN		8		4	F
3							18	1	1	0	1	1	0	4	1	G	PN		8		4	F
3							19	1	1	0	1	1	0	4	1	G	PN		8		4	F
3							20	1	1	0	1	1	0	4	1	G	PN		8		4	F
3							21	1	1	0	1	1	0	4	1	G	PN		8		4	F
3							22	1	1	0	1	1	0	4	1	G	PN		8		4	F
3							23	1	1	0	1	1	0	4	1	G	0		0		0	0
4		0	5	0	5	5	1	0	1	-1	1	1	0	2	1	G	PN		8		5	T	POS	3	3
4							2	0	1	-1	1	1	0	2	1	G	PN		8		5	T
4							3	0	1	-1	1	1	0	2	1	G	PN		8		5	T
4							4	0	1	-1	1	1	0	2	1	G	PN		7		4	F
4							5	0	1	-1	1	1	0	2	1	G	PN		5		3	F
5		0	9	0	9	9	1	0	1	-1	-1	0	-1	-2	1	B	PN		8		4	T	BIOCH
5							2	0	1	-1	-1	0	-1	-2	1	B	PN		8		4	T
5							3	0	1	-1	-1	0	-1	-2	1	B	PN		8		4	F
5							4	0	1	-1	-1	0	-1	-2	1	B	PN		8		4	F
5							5	0	1	-1	-1	0	-1	-2	1	B	PN		8		3	F
5							6	0	1	-1	-1	0	-1	-2	1	B	PN		8		3	F
5							7	0	1	-1	-1	0	-1	-2	1	B	PN		6		3	F
5							8	0	1	-1	-1	0	-1	-2	1	B	PN		4		2	D
5							9	0	1	-1	-1	0	-1	-2	1	B	PN		4		2	D
6	22	0	9	0	9	9	1	0	-1	-1	-1	1	-1	-3	1	B	PN		8		5	T	NEG
6	22						2	0	-1	-1	-1	1	-1	-3	1	B	PN		8		5	T
6	22						3	0	-1	-1	-1	1	-1	-3	1	B	PN		8		4	F
6	22						4	0	-1	-1	-1	1	-1	-3	1	B	PN		8		4	F
6	22						5	0	-1	-1	-1	1	-1	-3	1	B	PN		8		4	F
6	22						6	0	-1	-1	-1	0	-1	-4	1	B	PN		8		4	F
6	22						7	0	-1	-1	-1	0	-1	-4	1	B	PN		8		4	F
6	22						8	0	-1	-1	-1	0	-1	-4	1	B	PN		8		3	F
6	22						9	0	-1	-1	-1	0	-1	-4	1	B	0		0		0
7		4	10	6	20	10	1	-1	0	-1	0	0	0	-2	1	B	PN		8		4	T	BIOCH
7							2	-1	0	-1	0	0	0	-2	1	B	PN		8		4	T
7							3	-1	0	-1	0	0	0	-2	1	B	PN		8		4	T
7							4	-1	0	-1	0	0	0	-2	1	B	PN		8		4	F
7							5	-1	0	-1	0	0	0	-2	1	B	PN		8		3	F
7							6	-1	0	-1	0	0	0	-2	1	B	PN		8		3	F
7							7	-1	0	-1	0	0	0	-2	1	B	PN		8		3	F
7							8	-1	0	-1	0	0	0	-2	1	B	PN		5		3	D
7							9	-1	0	-1	0	0	0	-2	1	B	0		0		0	0
7							10	-1	0	-1	0	0	0	-2	1	B	0		0		0	0
8		0	2	1	3	2	1	1	0	0	-1	-1	-1	-2	1	B	PN		8		4	T	NEG
8							2	1	-1	-1	-1	-1	-1	-4	1	B	PN		10		3	T
9		0	2	3	5	2	1	-1	-1	-1	0	1	-1	-3	1	B	PN		8		4	T	POS	1	0
9							2	-1	-1	-1	0	1	-1	-3	1	B	PN		8		4	T
10		0	2	1	3	2	1	0	1	-1	-1	0	0	-1	1	G	PN		8		5	T	POS	1	1
10							2	-1	1	-1	-1	-1	0	-3	1	B	PN		8		5	T
11	22	5	15	5	25	15	1	1	1	-1	-1	1	1	2	1	G	PN	4	8		5	T	POS	2	2
11	22						2	1	1	-1	-1	1	1	2	1	G	PN	4	8		5	F
11	22						3	1	1	-1	-1	1	1	2	1	G	PN	4	4		3	D
11	22						4	1	1	-1	-1	1	1	2	1	G	PN	4	8		3	F
11	22						5	1	1	-1	-1	-1	1	0	1	G	PN	4	8		5	T
11	22						6	1	1	1	-1	1	1	4	1	G	PN	2	6		4	F
11	22						7	1	1	1	-1	1	1	4	1	G	PN	6	10		5	F
11	22						8	1	1	1	-1	1	1	4	1	G	0
11	22						9	1	1	1	-1	1	1	4	1	G	PN	4	8		4	F
11	22						10	1	1	-1	-1	1	1	2	1	G	PN	4	8		4	F
11	22						11	1	1	1	1	1	1	6	1	G	PN	4	8		5	T
11	22						12	1	1	-1	1	1	1	4	1	G	PN	4	5		3	D
11	22						13	1	1	-1	-1	1	1	2	1	G	PN	4	8		5	F
11	22						14	1	1	-1	-1	1	1	2	1	G	PN	4	8		5	F
11	22						15	-1	-1	-1	-1	0	0	-4	1	B	PN	4	8		4	F
12		1	6	0	7	6	1	-1	0	-1	-1	0	0	-3	1	B	PN		4		3	T	NEG
12							2	-1	0	-1	-1	0	0	-3	1	B	PN		6		3	T
12							3	-1	-1	0	0	0	-1	-3	1	B	PN		6		2	D
12							4	-1	0	0	-1	0	-1	-3	1	B	PN		6		2	D
12							5	-1	0	-1	0	0	-1	-3	1	B	PN		8		5	T
12							6	-1	0	-1	-1	0	-1	-4	1	B	PN		8		4	T
13		0	8	2	10	8	1	0	-1	-1	-1	-1	0	-4	1	B	PN		8		4	T	NEG
13							2	0	-1	0	-1	0	0	-2	1	B	PN		8		4	F
13							3	0	0	-1	0	-1	0	-2	1	B	PN		8		4	F
13							4	0	0	-1	0	-1	0	-2	1	B	PN		8		4	T
13							5	0	0	-1	-1	-1	0	-3	1	B	PN		8		3	F
13							6	0	0	-1	0	-1	0	-2	1	B	PN		8		4	T
13							7	0	-1	0	0	0	0	-1	1	G	PN		8		5	T
13							8	0	-1	-1	-1	0	0	-3	1	B	PN		8		3	F
14		1	3	1	5	3	1	-1	0	-1	-1	-1	1	-3	1	B	PN		8		3	T	NEG
14							2	-1	-1	-1	-1	-1	0	-5	1	B	PN		8		4	T
14							3	-1	0	-1	-1	1	-1	-3	1	B	PN		6		4	T
15		1	3	0	4	3	1	1	1	1	-1	1	1	4	1	G	PN		10		5	T	POS	2	2
15							2	1	1	1	-1	1	1	4	1	G	PN		8		5	T
15							3	1	1	1	-1	1	1	4	1	G	0					D
16		0	3	0	3	3	1	1	0	-1	-1	-1	1	-1	1	G	PN		8		5	T	NEG
16							2	1	-1	-1	-1	1	-1	-2	1	B	PN		8		4	T
16							3	1	0	-1	-1	1	0	0	1	G	PN		8		4	T
17		0	3	0	3	3	1	-1	1	-1	-1	1	-1	-2	1	B	PN		8		4	T	NEG
17							2	-1	1	-1	-1	1	-1	-2	1	B	PN		8		4	T
17							3	-1	1	-1	-1	1	-1	-2	1	B	PN		8		5	T
18		0	5	0	5	5	1	0	1	-1	-1	-1	-1	-3	1	B	PN		8		5	T	NEG
18							2	0	1	-1	-1	1	0	0	1	G	PN		4		3	T
18							3	0	-1	-1	-1	0	0	-3	1	B	PN		2		1	D
18							4	0	-1	-1	-1	0	0	-3	1	B	0					D
18							5	0	-1	-1	-1	-1	-1	-5	1	B	0					D
19		0	3	0	3	3	1	0	-1	-1	-1	1	-1	-3	1	B	PN		4		3	T	NEG
19							2	0	-1	-1	-1	1	-1	-3	1	B	PN		2		2	D
19							3	0	-1	-1	-1	1	-1	-3	1	B	PN		3		2	D
20		1	8	0	9	8	1	1	1	1	-1	1	-1	2	1	G	PN		8		4	T	POS	1	1
20							2	1	1	1	1	1	1	6	1	G	PN		8		4	T
20							3	1	1	1	-1	1	1	4	1	G	PN		8		5	T
20							4	1	-1	0	1	0	1	2	1	G	PN		8		4	D
20							5	1	-1	0	1	0	-1	0	1	G	PN		10		4	D
20							6	1	1	1	1	1	-1	4	1	G	0					D
20							7	1	1	1	-1	1	1	4	1	G	0					D
20							8	1	1	1	-1	1	1	4	1	G	0					D
21		0	2	0	2	2	1	0	-1	-1	-1	-1	-1	-5	1	B	PN		8		5	T	NEG
21							2	0	0	-1	-1	0	0	-2	1	B	0					D
22		0	5	3	8	5	1	0	0	-1	-1	0	0	-2	1	B	PN		4		3	T	NEG
22							2	0	0	-1	-1	0	0	-2	1	B	PN		4		3	T
22							3	0	-1	-1	-1	0	0	-3	1	B	PN		2		1	D
22							4	0	-1	-1	-1	0	0	-3	1	B	PN		Arrested			D
22							5	0	-1	-1	-1	0	0	-3	1	B	0					D
23	22	0	5	0	5	5	1	1	1	-1	-1	-1	1	0	1	G	PN		8		5	T	POS	2	2
23	22						2	1	1	-1	-1	1	1	2	1	G	PN		8		4	T
23	22						3	1	1	1	1	-1	1	4	1	G	PN		8		4	F
23	22						4	1	1	-1	-1	1	-1	0	1	G	PN		6		4	F
23	22						5	1	1	-1	-1	1	-1	0	1	G	PN		6		4	F
24		0	3	0	3	3	1	1	1	-1	1	1	1	4	1	G	PN		8		4	T	NEG
24							2	1	1	-1	1	1	1	4	1	G	PN		6		3	T
24							3	1	1	-1	1	1	1	4	1	G	0					D
25		0	3	1	4	3	1	-1	-1	-1	1	-1	1	-2	1	B	PN		5		3	T	NEG
25							2	-1	-1	-1	-1	-1	-1	-6	1	B	PN		5		3	T
25							3	-1	-1	-1	1	-1	1	-2	1	B	PN		5		3	T
26		0	6	7	13	6	1	0	-1	0	-1	0	0	-2	1	B	PN		8		5	T	NEG
26							2	0	0	0	-1	-1	0	-2	1	B	PN		8		4	T
26							3	0	-1	0	-1	-1	-1	-4	1	B	PN		3		4	D
26							4	0	-1	-1	-1	1	-1	-3	1	B	PN		8		4	T
26							5	0	-1	-1	-1	1	0	-2	1	B	0					D
26							6	0	-1	-1	-1	1	-1	-3	1	B	0					D
27		0	16	3	19	16	1	1	1	-1	1	1	-1	2	1	G	PN		10		4	T	POS	2	2
27							2	1	1	-1	1	1	-1	2	1	G	PN		8		4	F
27							3	1	1	-1	1	1	-1	2	1	G	PN		8		4	F
27							4	1	1	-1	1	-1	-1	0	1	G	PN		8		3	F
27							5	1	1	-1	1	1	-1	2	1	G	PN		8		3	F
27							6	1	1	-1	1	1	-1	2	1	G	PN		8		5	T
27							7	1	1	-1	1	1	-1	2	1	G	PN		6		3	F
27							8	1	1	-1	1	1	1	4	1	G	PN		6		4	F
27							9	1	1	-1	1	1	1	4	1	G	PN		8		4	F
27							10	1	1	-1	1	1	1	4	1	G	PN		8		3	F
27							11	1	1	-1	1	1	-1	2	1	G	PN		6		4	F
27							12	1	1	-1	1	1	-1	2	1	G	PN		8		4	F
27							13	-1	1	-1	1	1	-1	0	1	G	PN		8		3	F
27							14	1	1	-1	1	1	-1	2	1	G	PN		8		3	F
27							15	1	1	-1	1	1	-1	2	1	G	PN		arrested			D
27							16	1	1	-1	1	1	1	4	1	G	0					D
28		1	3	0	4	3	1	0	-1	-1	-1	-1	1	-3	1	B	PN		8		5	T	NEG
28							2	-1	-1	0	0	0	0	-2	1	B	PN		8		4	T
28							3	0	-1	-1	-1	0	0	-3	1	B	0					D
29		1	4	0	5	4	1	0	1	-1	1	1	1	3	1	G	PN		8		5	T	NEG
29							2	-1	1	-1	1	1	1	2	1	G	PN		8		5	T
29							3	0	1	-1	-1	1	-1	-1	1	G	PN		8		5	T
29							4	0	1	-1	-1	1	-1	-1	1	G	PN		8		3	T
30		2	10	0	12	10	1	0	0	-1	-1	0	-1	-3	1	B	PN		8		4	T	NEG
30							2	0	0	-1	0	0	0	-1	1	G	PN		8		4	F
30							3	-1	-1	-1	-1	-1	-1	-6	1	B	PN		8		5	T
30							4	0	0	-1	0	0	-1	-2	1	B	PN		8		5	T
30							5	-1	-1	-1	-1	-1	-1	-6	1	B	PN		8		5	T
30							6	0	0	-1	0	0	-1	-2	1	B	PN		8		3	F
30							7	0	0	-1	-1	0	-1	-3	1	B	PN		6		4	F
30							8	0	0	-1	0	0	0	-1	1	G	PN		8		3	F
30							9	0	0	-1	0	0	-1	-2	1	B	PN		8		4	F
30							10	0	0	-1	-1	0	-1	-3	1	B	0					D
31		0	5	1	6	5	1	1	1	-1	-1	1	-1	0	1	G	PN		5		5	T	POS	1	1
31							2	1	1	-1	-1	1	-1	0	1	G	0					D
31							3	1	1	-1	-1	1	1	2	1	G	Deg					D
31							4	1	1	-1	-1	1	1	2	1	G	1		8		5	T
31							5	1	1	-1	-1	1	1	2	1	G	1		8		3	T
32	24	0	11	2	13	11	1	1	1	1	-1	1	1	4	1	G	PN		8		5	T	Bioch
32	24						2	1	1	1	-1	1	1	4	1	G	PN		arrested			D
32	24						3	1	1	1	1	1	1	6	1	G	PN		8		5	T
32	24						4	1	1	1	1	1	1	6	1	G	PN		8		4	F
32	24						5	-1	1	1	1	1	1	4	1	G	PN		10		4	F
32	24						6	1	1	1	1	1	1	6	1	G	PN		arrested			D
32	24						7	1	1	-1	1	1	1	4	1	G	PN		8		4	F
32	24						8	1	1	-1	1	1	1	4	1	G	PN		8		3	F
32	24						9	1	1	-1	1	1	1	4	1	G	PN		8		3	F
32	24						10	1	1	1	1	1	1	6	1	G	PN		8		4	F
32	24						11	1	1	1	1	1	1	6	1	G	0					D
33	22	0	12	6	18	12	1	1	1	-1	-1	1	1	2	1	G	PN		8		5	T	POS	1	1
33	22						2	1	1	-1	-1	1	1	2	1	G	PN		8		5	T
33	22						3	1	1	-1	-1	1	1	2	1	G	PN		8		5	F
33	22						4	1	1	-1	-1	1	1	2	1	G	PN		8		5	F
33	22						5	1	1	-1	-1	1	1	2	1	G	PN		8		5	F
33	22						6	1	1	-1	-1	1	1	2	1	G	PN		8		5	F
33	22						7	1	1	-1	-1	1	1	2	1	G	PN		8		5	F
33	22						8	1	-1	1	-1	-1	-1	-2	1	B	PN		8		4	F
33	22						9	-1	1	-1	-1	1	-1	-2	1	B	PN		8		4	F
33	22						10	1	1	-1	-1	1	1	2	1	G	PN		8		4	F
33	22						11	1	1	-1	-1	1	1	2	1	G	PN		8		2	D
33	22						12	1	1	-1	-1	1	1	2	1	G	PN		8		2	D
34		0	3	0	3	3	1	1	1	-1	-1	1	1	2	1	G	PN		8+		5	T	POS	1	1
34							2	1	1	-1	-1	-1	1	0	1	G	PN		6		3	T
34							3	1	1	1	-1	1	-1	2	1	G	0					D
35		1	10	1	12	10	1	0	1	-1	-1	0	1	0	1	G	PN		8		5	T	NEG
35							2	0	1	-1	-1	0	1	0	1	G	PN		8		5	T
35							3	0	1	-1	-1	0	1	0	1	G	PN		8		5	T
35							4	0	1	-1	-1	0	1	0	1	G	PN		7		4	F
35							5	0	1	-1	-1	0	1	0	1	G	PN		6		4	F
35							6	0	1	-1	-1	-1	1	-1	1	G	0					D
35							7	0	1	-1	-1	-1	1	-1	1	G	PN		4		4	T
35							8	0	1	-1	-1	-1	1	-1	1	G	PN		2		1	D
35							9	0	1	-1	-1	0	-1	-2	1	G	PN		2		1	D
35							10	0	1	-1	-1	0	-1	-2	1	G	0					D
36		0	3	0	3	3	1	0	0	-1	-1	-1	0	-3	1	B	PN		8		4	T	NEG
36							2	0	0	-1	0	0	-1	-2	1	B	PN		8		3	T
36							3	0	-1	-1	-1	-1	-1	-5	1	B	PN		6		4	T
37		0	9	1	10	9	1	0	-1	-1	-1	1	-1	-3	1	B	PN		6		3	T	NEG	Day 2 ET
37							2	0	-1	-1	-1	1	-1	-3	1	B	PN		4		3	T
37							3	0	-1	-1	-1	1	-1	-3	1	B	PN		6		3	T
37							4	0	-1	-1	-1	1	-1	-3	1	B	PN		3		3	T
37							5	0	-1	-1	-1	1	-1	-3	1	B	0					D
37							6	0	0	-1	0	1	-1	-1	1	G	0					D
37							7	0	0	-1	-1	1	0	-1	1	G	0					D
37							8	-1	0	-1	-1	1	0	-2	1	B	0					D
37							9	-1	0	-1	-1	1	0	-2	1	G	PN		6		4	T
38		0	2	0	2	2	1	0	-1	-1	-1	1	-1	-3	1	B	PN		8		3	T	NEG
38							2	-1	1	-1	-1	-1	1	-2	1	B	PN		5		3	T
39		1	13	0	14	13	1	1	-1	-1	-1	1	1	0	1	G	PN		8		5	T	NEG
39							2	1	-1	-1	-1	1	1	0	1	G	PN		8		4	F
39							3	1	-1	-1	-1	1	1	0	1	G	PN		8		5	F
39							4	1	-1	-1	-1	1	1	0	1	G	0					D
39							5	1	-1	-1	-1	1	1	0	1	G	0					D
39							6	1	-1	-1	-1	1	1	0	1	G	PN		8		5	T
39							7	1	-1	-1	-1	1	1	0	1	G	PN		8		5	T
39							8	1	-1	-1	-1	1	1	0	1	G	PN		8		4	F
39							9	1	-1	-1	-1	1	1	0	1	G	PN		8		4	F
39							10	1	-1	-1	-1	1	1	0	1	G	PN		8		4	F
39							11	1	-1	-1	-1	1	1	0	1	G	PN		8		4	F
39							12	-1	-1	-1	-1	-1	1	-4	1	B	PN		8		4	F
39							13	1	-1	-1	-1	1	1	0	1	G	PN		8		3	F
40		0	2	0	2	2	1	0	1	0	-1	-1	-1	-2	1	B	PN		10		4	T	NEG
40							2	0	-1	-1	0	1	-1	-2	1	B	PN		6		4	T
41		0	6	0	6	6	1	-1	0	-1	-1	0	-1	-4	1	B	PN		8		3	T	NEG
41							2	0	0	-1	-1	-1	1	-2	1	B	PN		8		3	T
41							3	0	0	-1	-1	-1	1	-2	1	B	PN		8		4	T
41							4	0	0	-1	-1	0	1	-1	1	G	PN		4		3	D
41							5	0	0	-1	-1	0	1	-1	1	G	PN		8		3	T
41							6	0	-1	-1	-1	-1	1	-3	1	B	PN		8		2	D
42		0	3	0	3	3	1	-1	-1	-1	-1	1	1	-2	1	B	PN		7		4	T	Bioch.
42							2	-1	1	-1	-1	-1	1	-2	1	B	PN		8		5	T
42							3	-1	1	-1	-1	-1	1	-2	1	B	PN		8		3	T
43		2	6	2	10	6	1	0	0	-1	0	0	0	-1	1	G	PN		6		4	F	NEG
43							2	0	0	-1	-1	0	-1	-3	1	B	0					D
43							3	0	0	-1	-1	0	0	-2	1	B	PN		8		4	F
43							4	0	0	-1	-1	0	0	-2	1	B	PN		8		5	T
43							6	-1	-1	-1	-1	-1	0	-5	1	B	0					D
43							6	0	0	-1	-1	0	-1	-3	1	B	PN		8		4	T
44	29	1	15	1	17	15	1	1	0	-1	-1	1	1	1	1	G	PN		10		5	T	POS	1	1
44	29						2	1	0	-1	-1	1	1	1	1	G	PN		10		4	F
44	29						3	1	0	-1	-1	1	1	1	1	G	PN		8		5	T
44	29						4	1	0	-1	-1	1	1	1	1	G	PN		8		4	F
44	29						5	1	0	-1	-1	1	1	1	1	G	PN		8		4	F
44	29						6	1	0	-1	-1	1	1	1	1	G	PN		8		4	F
44	29						7	-1	0	-1	1	1	1	1	1	G	PN		8		4	F
44	29						8	1	0	-1	-1	1	1	1	1	G	PN		8		3	F
44	29						9	1	0	-1	-1	1	1	1	1	G	PN		8		3	F
44	29						10	1	0	-1	-1	1	1	1	1	G	PN		8		3	F
44	29						11	1	0	-1	-1	1	1	1	1	G	PN		8		3	F
44	29						12	1	0	-1	-1	1	1	1	1	G	0					D
44	29						13	1	0	-1	-1	1	1	1	1	G	0					D
44	29						14	1	0	-1	-1	-1	1	-1	1	G	PN		6		3	F
44	29						15	1	0	-1	-1	1	-1	-1	1	G	PN		6		2	D
45		1	2	0	3	2	1	-1	-1	-1	-1	-1	1	-4	1	B	PN		12		5	T	BIOCH
45							2	-1	-1	-1	-1	1	1	-2	1	B	PN		8		4	T
46		0	8	1	9	8	1	1	1	-1	0	1	1	3	1	G	PN		8		5	T	POS	2	2
46							2	1	1	-1	0	1	1	3	1	G	PN		8		5	F
46							3	1	1	-1	0	1	-1	1	1	G	PN		8		5	F
46							4	1	1	-1	0	1	1	3	1	G	PN		8		5	F
46							5	1	1	-1	0	1	1	3	1	G	PN		8		5	F
46							6	1	1	-1	0	1	1	3	1	G	PN		8		4	F
46							7	1	1	-1	0	1	1	3	1	G	PN		8		4	F
46							8	1	1	-1	0	1	1	3	1	G	PN		8		5	T
47	22	2	10	1	13	10	1	1	0	0	0	1	0	2	1	G	PN		8		4	F	POS	1	1
47	22						2	1	0	0	0	1	0	2	1	G	PN		8		4	F
47	22						3	1	0	0	0	1	0	2	1	G	PN		6		4	F
47	22						4	1	0	0	0	1	0	2	1	G	PN		8		5	T
47	22						5	0	0	-1	-1	1	1	0	1	G	0					D
47	22						6	0	1	-1	0	1	0	1	1	G	0				0	D
47	22						7	1	1	-1	1	1	1	4	1	G	PN		8		5	T
47	22						8	0	-1	-1	-1	1	1	-1	1	G	0					D
47	22						9	1	-1	0	0	1	1	2	1	G	PN		6		2	D
47	22						10	-1	-1	0	0	1	1	0	1	G	PN		3		1	D
48		0	8	2	10	8	1	0	-1	-1	-1	0	1	-2	1	B	PN		4		4	D	NEG
48							2	0	-1	-1	-1	0	1	-2	1	B	PN		3		4	D
48							3	-1	-1	-1	-1	0	-1	-5	1	B	PN		5		4	T
48							4	0	-1	-1	0	1	0	-1	1	B	PN		8		4	T
48							5	-1	0	-1	-1	0	1	-2	1	B	PN		3		3	D
48							6	0	-1	-1	-1	0	1	-2	1	B	PN		12		5	T
48							7	0	-1	-1	-1	0	1	-2	1	B	PN		6		4	T
48							8	0	-1	-1	-1	-1	-1	-5	1	B	PN		1		1	D
49		0	7	1	8	7	1	0	0	-1	-1	0	1	-1	1	G	PN		8		5	T	POS	1	0
49							2	0	0	-1	-1	0	1	-1	1	G	PN		8		4	T
49							3	0	-1	-1	1	1	-1	-1	1	G	PN		6		3	D
49							4	0	0	-1	-1	0	1	-1	1	G	PN		8		5	T
49							5	-1	0	-1	-1	0	-1	-4	1	B	PN		8		5	T
49							6	-1	-1	-1	-1	0	0	-4	1	B	PN		2		2	D
49							7	-1	-1	-1	-1	0	1	-3	1	B	PN		6		3	D
50		0	6	1	7	6	1	0	-1	-1	-1	0	1	-2	1	B	PN		8		5	T	NEG
50							2	0	-1	-1	-1	1	-1	-3	1	B	PN		6		4	F
50							3	-1	-1	-1	-1	-1	-1	-6	1	B	PN		2		2	D
50							4	0	0	-1	-1	0	0	-2	1	B	PN		8		4	T
50							5	-1	0	-1	0	0	0	-2	1	B	PN		8		5	T
50							6	0	-1	-1	-1	1		-2	1	B	PN		8		4	F
51		1	9	2	12	9	1	0	0	-1	-1	0	-1	-3	1	B	PN		6		3	F	NEG
51							2	0	0	-1	-1	0	-1	-3	1	B	PN		8		3	F
51							3	1	-1	-1	-1	1	1	0	1	G	0					D
51							4	-1	0	-1	-1	-1	0	-4	1	B	PN		8		5	T
51							5	0	-1	-1	-1	1	0	-2	1	B	PN		5		3	D
51							6	-1	-1	-1	0	1	0	-2	1	B	0					D
51							7	0	-1	-1	-1	-1	1	-3	1	B	PN		8		4	T
51							8	0	-1	-1	0	1	0	-1	1	G	PN		6		3	F
51							9	-1	-1	0	0	-1	-1	-4	1	B	PN		6		3	F
52		0	3	0	3	3	1	-1	0	-1	-1	-1	-1	-5	1	B	PN		2		2	D	NEG
52							2	0	0	-1	-1	0	0	-2	1	B	PN		8		4	T
52							3	0	0	-1	1	0	1	1	1	G	3PN					D
53		1	3	0	4	3	1	-1	-1	-1	-1	-1	0	-5	1	B	PN		8		3	T	POS	1	1
53							2	-1	-1	-1	-1	0	1	-3	1	B	0					D
53							3	-1	-1	-1	-1	0	0	-4	1	B	PN		4		4	T
54		0	5	0	5	5	1	1	1	-1	1	1	1	4	1	G	PN		8		4	T	POS	1	1
54							2	-1	0	0	0	1	-1	-1	1	G	0					D
54							3	0	1	-1	1	1	-1	1	1	G	PN		8		4	D
54							4	0	1	-1	0	1	1	2	1	G	PN		8		4	D
54							5	-1	-1	-1	-1	1	1	-2	1	G	PN		8		4	T
55		0	2	0	2	2	1	-1	0	-1	-1	-1	1	-3	1	B	PN		8		4	T	NEG
55							2	-1	0	-1	-1	-1	1	-3	1	B	0					D
56	27	0	8	2	10	8	1	1	1	1	-1	0	1	3	1	G	PN		12		5	T	POS	1	1
56	27						2	1	1	0	-1	0	1	2	1	G	PN		8		5	T
56	27						3	1	1	0	-1	0	-1	0	1	G	PN		8		4	F
56	27						4	0	1	0	-1	0	1	1	1	G	PN		8		4	F
56	27						5	0	1	0	-1	0	1	1	1	G	PN		8		3	F
56	27						6	0	0	-1	-1	1	1	0	1	G	PN		8		3	F
56	27						7	0	0	-1	-1	1	1	0	1	G	PN		6		4	F
56	27						8	-1	1	0	-1	-1	-1	-3	1	B	0					D
57		0	6	1	7	6	1	-1	0	-1	-1	-1	-1	-5	1	B	PN		3		2	D	POS	1	0
57							2	0	0	-1	-1	0	0	-2	1	B	PN		6		4	T
57							3	-1	0	-1	-1	1	-1	-3	1	B	PN		8		5	T
57							4	0	0	-1	0	0	-1	-2	1	B	0					D
57							5	-1	0	-1	0	-1	-1	-4	1	B	PN		8		4	T
57							6	0	0	-1	0	0	-1	-2	1	B	PN		8		4	T
58	27	2	9	1	12	9	1	-1	-1	-1	-1	0	-1	-5	1	B	PN		10		4	F	NEG
58	27						2	0	0	-1	-1	0	-1	-3	1	B	PN		10		4	F
58	27						3	-1	0	-1	-1	0	-1	-4	1	B	PN		10		4	F
58	27						4	-1	0	-1	-1	0	-1	-4	1	B	PN		8		5	T
58	27						5	0	-1	-1	-1	0	-1	-4	1	B	PN		6		3	F
58	27						6	-1	0	-1	-1	-1	-1	-5	1	B	PN		12		4	T
58	27						7	-1	-1	-1	-1	1	-1	-4	1	B	PN		12		4	F
58	27						8	-1	-1	-1	-1	0	1	-3	1	B	PN		10		4	F
58	27						9	-1	0	-1	0	1	-1	-2	1	B	PN		4		2	D
59		0	9	0	9	9	1	-1	-1	-1	0	1	-1	-3	1	B	PN		8		4	T	NEG
59							2	-1	-1	-1	0	1	-1	-3	1	B	PN		arrested			D
59							3	-1	-1	-1	0	1	0	-2	1	B	PN		4		2	D
59							4	-1	-1	-1	-1	1	-1	-4	1	B	PN		6		3	T
59							5	-1	-1	-1	-1	1	-1	-4	1	B	0					D
59							6	-1	-1	-1	-1	1	0	-3	1	B	PN		6		4	T
59							7	-1	-1	-1	-1	1	0	-3	1	B	0					D
59							8	-1	0	-1	-1	-1	0	-4	1	B	PN		6		3	T
59							9	-1	-1	-1	-1	1	-1	-4	1	B	0					D
60		0	2	2	4	2	1	-1	0	-1	-1	-1	1	-3	1	B	PN		4		3	T	NEG
60							2	-1	0	-1	-1	0	-1	-4	1	B	PN		4		3	T
61		0	2	0	2	2	1	0	0	-1	-1	1	0	-1	1	G	PN		8		5	T
61							2	0	0	-1	-1	1	0	-1	1	G	PN		8		4	F
62		0	5	1	6	5	1	0	0	0	-1	1	0	0	1	G	PN		3		1	D	POS	2	2
62							2	0	0	0	-1	1	1	1	1	G	PN		8		4	D
62							3	0	0	0	0	1	1	2	1	G	PN		morula		5	T
62							4	-1	0	-1	0	1	0	-1	1	G	PN		8		5	T
62							5	0	0	0	0	-1	0	-1	1	G	PN		4		3	D
63		0	4	0	4	4	1	0	0	0	-1	0	1	0	1	G	PN		8		3	T	NEG
63							2	0	1	-1	-1	1	0	0	1	G	PN		8		4	T
63							3	0	1	-1	-1	0	1	0	1	G	0					D
63							4	-1	0	-1	-1	-1	0	-4	1	B	PN		8		3	T
64		1	8	1	10	8	1	-1	0	0	-1	0	1	-1	1	G	PN		8		5	T	NEG
64							2	-1	0	0	-1	0	1	-1	1	G	PN		8		3	T
64							3	0	0	-1	0	1	1	1	1	G	PN		8		5	T
64							4	-1	0	-1	-1	0	1	-2	1	B	PN		8		5	T
64							5	0	0	-1	0	0	1	0	1	G	PN		2		4	D
64							6	0	0	-1	-1	0	0	-2	1	B	PN		8		4	T
64							7	0	0	-1	-1	0	1	-1	1	G	PN		8		3	T
64							8	-1	0	-1	-1	1	1	-1	1	G	PN		morula		5	T
65		0	2	1	3	2	1	0	1	-1	-1	1	1	1	1	G	PN		8		4	T	NEG
65							2	0	1	0	-1	1	1	2	1	G	PN		arrested			D
66		1	8	5	14	8	1	1	1	0	-1	1	0	2	1	G	PN		12		5	T	NEG
66							2	1	1	1	-1	1	-1	2	1	G	PN		8		4	T
66							3	1	1	-1	-1	1	1	2	1	G	PN		8		4	F
66							4	0	0	0	-1	1	0	0	1	G	PN		10		4	T
66							5	0	0	0	-1	1	0	0	1	G	PN		8		5	T
66							6	0	0	0	-1	1	1	1	1	G	0					D
66							7	0	1	0	-1	1	-1	0	1	G	0					D
66							8	0	0	0	-1	1	0	0	1	G	PN		8		4	F
67		1	4	1	6	4	1	0	1	-1	-1	1	1	1	1	G	PN		8		4	T	NEG
67							2	-1	1	-1	-1	0	1	-1	1	G	0					D
67							3	-1	1	-1	-1	0	1	-1	1	G	PN		4		5	T
67							4	-1	0	-1	-1	0	-1	-4	1	B	0					D
68		2	6	3	11	6	1	-1	-1	-1	-1	0	0	-4	1	B	ABN					D	NEG
68							2	-1	1	-1	-1	0	0	-2	1	B	PN		10		3	T
68							3	0	0	-1	0	-1	0	-2	1	B	0					D
68							4	-1	-1	-1	-1	1	1	-2	1	B	PN		8		5	T
68							5	-1	-1	-1	-1	0	1	-3	1	B	PN		3		2	D
68							6	-1	0	-1	-1	0	1	-2	1	B	PN		10		4	T
70	24	4	13	3	20	13	1	1	1	0	1	0	0	3	1	G	PN		morula		5	T	NEG
70	24						2	0	0	0	0	0	1	1	1	G	PN		10		4	F
70	24						3	0	1	0	1	1	0	3	1	G	PN		10		4	F
70	24						4	0	1	-1	0	1	-1	0	1	G	PN		8		4	F
70	24						5	1	1	1	0	1	1	5	1	G	PN		10		4	F
70	24						6	0	1	0	-1	0	1	1	1	G	PN		8		4	F
70	24						7	0	0	0	0	1	1	2	1	G	0					D
70	24						8	0	0	0	0	0	1	1	1	G	0					D
70	24						9	1	1	1	1	0	1	5	1	G	PN		8		5	F
70	24						10	0	0	0	1	1	0	2	1	G	PN		10		5	T
70	24						11	1	0	1	0	0	0	2	1	G	PN		8		4	F
70	24						12	1	0	1	0	1	0	3	1	G	PN		8		4	F
70	24						13	0	1	0	1	0	0	2	1	G	PN		10		4	F
71		0	2	0	2	2	1	1	1	1	1	0	1	5	1	G	PN		10		5	T	NEG
71							2	0	0	-1	-1	0	1	-1	1	G	0					D
72		1	5	1	7	5	1	0	0	0	-1	0	0	-1	1	G	PN		6		3	T	NEG
72							2	-1	-1	0	-1	0	0	-3	1	B	PN		8		4	T
72							3	-1	0	-1	-1	-1	1	-3	1	B	0					D
72							4	-1	0	-1	-1	-1	1	-3	1	B	0					D
72							5	-1	1	0	-1	-1	-1	-3	1	B	PN		10		3	T
73		1	6	4	11	6	1	0	1	-1	0	0	0	0	1	G	PN		8		4	T	NEG
73							2	0	1	-1	0	0	0	0	1	G	PN		10		3	F
73							3	0	1	-1	0	1	-1	0	1	G	0					D
73							4	0	1	-1	0	1	-1	0	1	G	PN		8		5	T
73							5	0	1	0	0	1	-1	1	1	G	0					D
73							6	0	1	0	0	0	1	2	1	G	0					D
74		0	2	0	2	2	1	-1	0	-1	-1	0	1	-2	1	B	PN		8		4	T	NEG
74							2	-1	-1	-1	-1	0	0	-4	1	B	PN		4		3	T
75	23	1	23	2	26	23	1	1	1	0	0	1	1	4	1	G	PN		8		4	F	POS	2	2
75	23						2	1	1	0	0	1	1	4	1	G	PN		8		4	F
75	23						3	1	0	0	0	1	1	3	1	G	PN		8		3	F
75	23						4	1	0	0	0	1	1	3	1	G	PN		8		4	F
75	23						5	0	1	0	-1	-1	1	0	1	G	PN		8		3	F
75	23						6	1	1	0	1	1	0	4	1	G	PN		8		5	F
75	23						7	1	1	0	-1	1	0	2	1	G	PN		8		5	T
75	23						8	0	0	-1	-1	1	-1	-2	1	B	PN		8		4	F
75	23						9	0	0	0	-1	1	0	0	1	G	PN		4		4	D
75	23						10	0	1	0	0	0	0	1	1	G	PN		8		4	F
75	23						11	1	1	0	1	1	0	4	1	G	PN		6		4	F
75	23						12	0	1	-1	-1	1	0	0	1	G	PN		6		4	F
75	23						13	0	1	-1	-1	1	0	0	1	G	PN		8		4	F
75	23						14	0	0	-1	1	0	0	0	1	G	PN		6		3	F
75	23						15	0	-1	-1	0	1	0	-1	1	G	PN		8		4	F
75	23						16	1	1	0	0	1	1	4	1	G	0					D
75	23						17	1	1	0	0	1	1	4	1	G	PN		8		4	F
75	23						18	1	1	0	0	1	1	4	1	G	PN		8		4	F
75	23						19	1	1	0	0	1	1	4	1	G	PN		8		3	F
75	23						20	0	0	0	0	1	0	1	1	G	PN		8		4	F
75	23						21	0	0	0	-1	0	0	-1	1	G	PN		8		4	T
75	23						22	0	0	0	-1	0	0	-1	1	G	PN		8		3	F
75	23						23	0	0	0	-1	0	0	-1	1	G	PN		8		4	F
76		1	2	0	3	2	1	-1	-1	0	-1	0	0	-3	1	B	PN		8		5	T	NEG
76							2	-1	0	-1	-1	-1	-1	-5	1	B	PN		8		4	T
77		0	5	0	5	5	1	0	0	0	-1	-1	1	-1	1	G	PN		4		4	D	POS	1	1
77							2	0	0	0	-1	0	1	0	1	G	PN		4		3	D
77							3	0	0	0	0	1	1	2	1	G	PN		8		5	T
77							4	-1	0	-1	-1	1	-1	-3	1	B	PN		8		5	T
77							5	-1	0	0	-1	1	-1	-2	1	B	PN		6		4	T
78		0	5	1	5	5	1	1	1	0	0	0	0	2	1	G	PN		8		3	F	POS	3	2
78							2	1	1	0	0	0	0	2	1	G	PN		8		4	T
78							3	1	1	0	0	0	0	2	1	G	PN		8		4	T
78							4	0	0	-1	-1	0	1	-1	1	G	PN		8		4	T
78							5	0	0	0	0	0	0	0	1	G	PN		8		4	F
79		0	2	0	2	2		0	0	-1	0	1	0	0	1	G	PN		8		4	T	POS	1	1
79								0	0	-1	-1	1	0	-1	1	G	PN		8		5	T
80		1	3	1	5	3	1	-1	0	-1	-1	0	1	-2	1	B	0						NEG
80							2	-1	0	-1	-1	0	1	-2	1	G	PN		8		4	T
80							3	-1	0	-1	-1	0	-1	-4	1	B	PN		8		4	T
81		1	2	2	5	2	1	0	1	1	-1	-1	1	1	1	G	PN		6		3	T	NEG
81							2	0	1	1	-1	-1	-1	-1	1	G	PN		Arrested
82		1	4	0	5	4	1	0	1	-1	0	1	-1	0	1	G	0					D	POS	3	1
82							2	-1	1	-1	-1	-1	-1	-4	1	B	PN		4		4	T
82							3	0	1	-1	-1	1	0	0	1	G	PN		10		5	T
82							4	1	1	0	0	1	1	4	1	G	PN		8		3	T
83		1	7	0	8	7	1	0	0	-1	-1	1	0	-1	1	G	0					D	NEG
83							2	1	1	0	0	1	1	4	1	G	PN		8		3	T
83							3	0	1	0	-1	1	1	2	1	G	PN		8		3	T
83							4	0	1	-1	-1	1	1	1	1	G	PN		8		3	T
83							5	0	0	-1	-1	0	1	-1	1	G	PN		8		3	T
83							6	1	1	0	1	0	1	4	1	G	PN		6		3	T
83							7	-1	1	0	-1	-1	1	-1	1	G	0					D
84	31	2	15	0	17	15	1	1	1	0	0	1	-1	2	1	G	0					D	NEG
84	31						2	1	1	0	0	1	-1	2	1	G	PN		8		4	F
84	31						3	1	0	0	-1	1	-1	0	1	G	PN		8		5	F
84	31						4	1	0	0	-1	1	-1	0	1	G	PN		8		5	F
84	31						5	1	0	0	-1	1	-1	0	1	G	PN		8		4	F
84	31						6	1	0	0	-1	1	-1	0	1	G	PN		8		5	F
84	31						7	1	0	0	-1	1	1	2	1	G	PN		8		5	F
84	31						8	1	0	0	-1	1	1	2	1	G	0					D
84	31						9	1	0	0	-1	1	1	2	1	G	PN		8		5	F
84	31						10	1	0	0	0	1	0	2	1	G	PN		10		4	F
84	31						11	1	0	0	-1	1	1	2	1	G	PN		6		5	F
84	31						12	1	0	0	-1	1	1	2	1	G	PN		morula			T
84	31						13	1	0	0	-1	1	1	2	1	G	PN		8		5	F
84	31						14	1	0	0	-1	0	-1	-1	1	G	PN		8		5	F
84	31						15	1	0	0	-1	0	-1	-1	1	G	PN		8		4	F
85		0	5	3	8	5	1	-1	0	-1	-1	-1	-1	-5	1	B	PN		4		3	D	NEG
85							2	0	1	1	-1	0	-1	0	1	G	PN		8		5	T
85							3	0	0	-1	-1	-1	-1	-4	1	B	PN		6		5	T
85							4	-1	0	-1	-1	-1	0	-4	1	B	PN		8		4	T
85							5	-1	-1	-1	0	1	-1	-3	1	B	PN		8		3	T
86		0	2	0	2	2	1	-1	0	-1	-1	1	0	-2	1	B	PN		4		3	T	NEG
86							2	0	-1	-1	0	1	-1	-2	1	B	PN		6		3	T
87		1	4	2	7	4	1	0	0	-1	-1	-1	0	-3	1	B	0
87							2	0	0	-1	-1	-1	0	-3	1	B	PN		8		3	T
87							3	0	0	-1	-1	-1	0	-3	1	B	PN		8		4	T
87							4	0	0	-1	-1	-1	0	-3	1	B	PN		4		4	T
88		2	9	0	11	9	1	0	1	-1	-1	1	-1	-1	1	G	PN		8		5	T	NEG
88							2	0	1	-1	-1	1	-1	-1	1	G	0					D
88							3	0	1	-1	-1	0	-1	-2	1	B	PN		8		4	F
88							4	-1	1	-1	-1	0	-1	-3	1	B	PN		6		4	F
88							5	-1	-1	-1	-1	-1	-1	-6	1	B	PN		8		5	T
88							6	-1	-1	-1	-1	-1	-1	-6	1	B	PN		8		4	F
88							7	-1	0	-1	-1	-1	0	-4	1	B	PN		8		4	F
88							8	-1	0	-1	-1	-1	0	-4	1	B	0					D
88							9	0	0	-1	-1	0	0	-2	1	B	PN		8		4	F
89		1	3	6	10	3	1	-1	-1	0	-1	-1	0	-4	1	B	PN		8		3	T	POS	2	2
89							2	-1	-1	0	-1	-1	0	-4	1	B	PN		arrested			D
89							3	-1	-1	0	-1	-1	0	-4	1	B	PN		8		3	T
90		1	5	4	10	8	1	1	1	0	-1	0	1	2	1	B	PN		Arrested			D	NEG
90							2	-1	0	-1	-1	0	-1	-4	1	B	0					D
90							3	1	1	0	0	0	1	3	1	B	PN		10		5	T
90							4	0	1	-1	0	1	0	1	1	G	PN		Arrested			D
90							5	0	1	0	0	0	0	1	1	G	0					D
90							6	0	-1	0	0	0	-1	-2	1	B	PN		6		3	T
90							7	0	-1	0	0	0	-1	-2	1	B	PN		8		4	T
90							8	0	-1	0	0	0	-1	-2	1	B	PN		8		4	T
91	20	1	18	1	20	18	1	0	0	-1	-1	1	0	-1	1	G	PN		8		5	T	NEG
91	20						2	0	0	-1	-1	1	0	-1	1	G	PN		8		5	T
91	20						3	0	0	-1	-1	1	0	-1	1	G	PN		8		4	F
91	20						4	0	0	-1	-1	1	0	-1	1	G	PN		10		4	F
91	20						5	0	0	-1	-1	1	0	-1	1	G	PN		10		3	F
91	20						6	0	0	-1	-1	1	0	-1	1	G	PN		8		4	F
91	20						7	0	0	-1	-1	1	0	-1	1	G	PN		8		4	F
91	20						8	0	0	-1	-1	1	0	-1	1	G	PN		12		4	F
91	20						9	0	0	-1	-1	1	0	-1	1	G	PN		8		4	F
91	20						10	0	0	-1	-1	1	0	-1	1	G	PN		8		4	F
91	20						11	0	0	-1	-1	1	0	-1	1	G	PN		8		3	F
91	20						12	0	0	-1	-1	1	0	-1	1	G	PN		12		4	F
91	20						13	0	0	-1	-1	1	0	-1	1	G	PN		12		5	F
91	20						14	0	0	-1	-1	1	0	-1	1	G	PN		12		5	F
91	20						15	0	0	-1	-1	1	0	-1	1	G	PN		12		4	F
91	20						16	0	0	-1	-1	1	0	-1	1	G	PN		arrested			D
91	20						17	0	0	-1	-1	1	0	-1	1	G	0					D
91	20						18	0	0	-1	-1	1	0	-1	1	G	0					D
92		0	2	0	2	2	1	0	0	-1	-1	0	-1	-3	1	B	0					D	NEG
92							2	0	0	-1	-1	-1	0	-3	1	B	PN		6		4	T
93		2	16	0	18	16	1	1	1	0	0	0	0	2	1	G	PN		8		5	T	POS	1	1
93							2	1	1	0	-1	1	1	3	1	G	PN		8		5	T
93							3	1	1	0	-1	1	1	3	1	G	PN		8		4	F
93							4	1	1	0	1	1	1	5	1	G	PN		8		4	F
93							5	1	1	0	1	1	1	5	1	G	PN		8		4	F
93							6	1	1	0	-1	1	1	3	1	G	PN		6		4	F
93							7	1	1	0	-1	1	-1	1	1	G	PN		8		5	F
93							8	1	1	0	0	0	1	3	1	G	PN		8		4	F
93							9	1	1	0	0	0	1	3	1	G	PN		8		4	F
93							10	1	1	0	0	0	1	3	1	G	PN		6		4	F
93							11	1	1	0	-1	1	1	3	1	G	PN		8		4	F
93							12	1	1	0	-1	1	1	3	1	G	PN		8		4	F
93							13	1	1	0	-1	1	0	2	1	G	PN		8		5	F
							14	1	1	0	-1	1	-1	1	1	G	PN		8		4	F
							15	1	1	0	-1	1	1	3	1	G	PN		8		5	F
							16	1	1	0	-1	1	1	3	1	G	PN		8		4	F
94		1	9	1	11	9	1	0	1	0	-1	0	-1	-1	1	G	PN		8		5	T	POS	3	2
94							2	0	1	0	-1	0	-1	-1	1	G	PN		8		5	T
94							3	0	1	0	-1	0	-1	-1	1	G	PN		8		4	F
94							4	0	1	0	-1	0	-1	-1	1	G	PN		8		4	F
94							5	1	1	0	-1	1	1	3	1	G	PN		8		4	F
94							6	0	1	0	0	0	1	2	1	G	PN		8		5	T
94							7	-1	0	-1	-1	0	-1	-4	1	B	PN		8		4	F
94							8	0	1	0	0	0	-1	0	1	G	PN		8		4	F
94							9	0	1	0	0	0	-1	0	1	G	PN		Arrested			D
95		1	2	1	4	2	1	0	0	0	0	0	0	0	1	G	PN		8		4	T	NEG
95							2	-1	0	-1	-1	0	0	-3	1	B	PN		8		3	T
96														0
